# Supplementary material
Source: PubMed Central journal article supplement (PMC7492842)
Supplement: mmc1.pdf [file mmc1.pdf]

**Cell Host & Microbe, Volume 28**

**Supplemental Information**

**Convergent Evolution in Breadth of Two**

**V<sub>H</sub>6-1-Encoded Influenza Antibody**

**Clonotypes from a Single Donor**

**Nicholas C. Wu, Sarah F. Andrews, Julie E. Raab, Sarah O'Connell, Chaim A. Schramm, Xintao Ding, Michael J. Chambers, Kwanyee Leung, Lingshu Wang, Yi Zhang, John R. Mascola, Daniel C. Douek, Julie E. Ledgerwood, Adrian B. McDermott, and Ian A. Wilson**

**Table S1, related to Figure 1. Binding of mAb Fabs to HA by biolayer interferometry (BLI)**

| HA        | Fab       | KD         | Kon        | Koff     |
|-----------|-----------|------------|------------|----------|
| H7 SH13   | ClonA UCA | 1.42E-06   | 2.61E+04   | 3.70E-02 |
|           | 58-1C02   | 7.27E-06   | 6.51E+04   | 4.73E-01 |
|           | 54-1B01   | 3.81E-06   | 1.22E+04   | 4.63E-02 |
|           | 54-1G07   | 4.65E-06   | 1.37E+04   | 6.35E-02 |
|           | 54-4G07   | 1.04E-06   | 2.22E+04   | 2.31E-02 |
|           | 54-4H03   | 1.59E-07   | 2.55E+04   | 4.05E-03 |
|           | ClonB UCA | 6.17E-06   | 2.09E+04   | 1.29E-01 |
|           | 58-6E11   | No Binding |            |          |
|           | 58-6B09   | No Binding |            |          |
|           | 58-6E04   | No Binding |            |          |
|           | 58-6F03   | 1.43E-06   | 1.06E+04   | 1.53E-02 |
|           | 54-1G05   | 9.61E-07   | 4.99E+04   | 4.79E-02 |
|           | H3 HK68   | ClonA UCA  | 4.31E-09   | 9.64E+04 |
| 58-1C02   |           | 2.80E-09   | 8.37E+04   | 2.35E-04 |
| 54-1B01   |           | NA         | 6.25E+04   | No Diss  |
| 54-1G07   |           | NA         | 5.66E+04   | No Diss  |
| 54-4G07   |           | 4.94E-09   | 5.11E+04   | 2.53E-04 |
| 54-4H03   |           | NA         | 9.14E+04   | No Diss  |
| ClonB UCA |           | 7.59E-07   | 1.20E+04   | 9.13E-03 |
| 58-6E11   |           | 6.43E-07   | 9.49E+03   | 6.11E-03 |
| 58-6B09   |           | 3.11E-06   | 1.10E+04   | 3.43E-02 |
| 58-6E04   |           | 5.90E-07   | 1.15E+04   | 6.81E-03 |
| 58-6F03   |           | 4.36E-08   | 1.66E+05   | 7.25E-03 |
| 54-1G05   |           | 1.37E-08   | 1.32E+05   | 1.80E-03 |
| H3 TX12   |           | ClonA UCA  | 6.96E-08   | 3.17E+04 |
|           | 58-1C02   | 4.24E-08   | 1.96E+04   | 8.33E-04 |
|           | 54-1B01   | 5.72E-09   | 1.48E+04   | 8.45E-05 |
|           | 54-1G07   | 4.28E-09   | 2.12E+04   | 9.06E-05 |
|           | 54-4G07   | 6.29E-08   | 2.54E+04   | 1.60E-03 |
|           | 54-4H03   | 2.27E-09   | 5.24E+04   | 1.19E-04 |
|           | ClonB UCA | No Binding |            |          |
|           | 58-6E11   | No Binding |            |          |
|           | 58-6B09   | No Binding |            |          |
|           | 58-6E04   | No Binding |            |          |
|           | 58-6F03   | 7.54E-07   | 3.13E+04   | 2.36E-02 |
|           | 54-1G05   | 3.56E-07   | 6.63E+04   | 2.36E-02 |
|           | H10 JX13  | ClonA UCA  | 2.90E-06   | 2.10E+04 |
| 58-1C02   |           | No Binding |            |          |
| 54-1B01   |           | 1.40E-06   | 1.90E+03   | 1.10E-02 |
| 54-1G07   |           | 4.50E-06   | 1.20E+04   | 5.50E-02 |
| 54-4G07   |           | 1.90E-06   | 2.30E+04   | 4.20E-02 |
| 54-4H03   |           | 1.50E-07   | 6.40E-04   | 9.30E-03 |
| ClonB UCA |           | 3.26E-06   | 3.37E+04   | 1.10E-01 |
| 58-6E11   |           | 4.70E-06   | 7.80E+04   | 3.60E-01 |
| 58-6B09   |           | 1.30E-06   | 1.00E+04   | 1.30E-02 |
| 58-6E04   |           | 1.50E-06   | 8.70E+02   | 1.30E-02 |
| 58-6F03   |           | 1.50E-07   | 6.40E+04   | 9.30E-03 |
| 54-1G05   |           | 1.20E-06   | 2.30E+04   | 2.80E-02 |
| H6 TW13   |           | ClonA UCA  | No Binding |          |
|           | 58-1C02   | 3.65E-09   | 9.14E+03   | 3.33E-05 |
|           | 54-1B01   | 4.21E-07   | 3.66E+03   | 1.54E-03 |
|           | 54-1G07   | 2.56E-08   | 4.72E+03   | 1.21E-04 |
|           | 54-4G07   | 2.74E-06   | 6.45E+03   | 1.77E-02 |
|           | 54-4H03   | 5.35E-06   | 7.11E+03   | 3.80E-02 |
|           | ClonB UCA | 2.34E-07   | 2.70E+04   | 6.33E-03 |
|           | 58-6E11   | 1.60E-08   | 2.62E+04   | 4.18E-04 |
|           | 58-6B09   | 2.23E-07   | 3.58E+04   | 7.97E-03 |
|           | 58-6E04   | NA         | 5.69E+04   | No Diss  |
|           | 58-6F03   | NA         | 5.42E+04   | No Diss  |
|           | 54-1G05   | 5.09E-10   | 3.90E+04   | 1.99E-05 |

| HA        | Fab       | KD         | Kon        | Koff     |
|-----------|-----------|------------|------------|----------|
| H1 CA09   | ClonA UCA | 1.35E-06   | 2.26E+04   | 3.04E-02 |
|           | 58-1C02   | NA         | 2.80E+04   | No Diss  |
|           | 54-1B01   | NA         | 1.63E+04   | No Diss  |
|           | 54-1G07   | NA         | 1.70E+04   | No Diss  |
|           | 54-4G07   | 9.74E-08   | 5.19E+04   | 5.06E-03 |
|           | 54-4H03   | 4.09E-08   | 9.55E+04   | 3.90E-03 |
|           | ClonB UCA | 1.83E-08   | 1.43E+05   | 2.61E-03 |
|           | 58-6E11   | 4.59E-09   | 1.12E+05   | 5.16E-04 |
|           | 58-6B09   | 7.80E-09   | 1.67E+05   | 1.30E-03 |
|           | 58-6E04   | 3.50E-09   | 2.34E+05   | 8.19E-04 |
|           | 58-6F03   | NA         | 2.08E+05   | No Diss  |
|           | 54-1G05   | NA         | 1.81E+05   | No Diss  |
|           | H1 NC99   | ClonA UCA  | No Binding |          |
| 58-1C02   |           | 2.70E-08   | 8.30E+03   | 2.30E-04 |
| 54-1B01   |           | 1.40E-07   | 5.40E+03   | 7.50E-04 |
| 54-1G07   |           | 9.90E-09   | 5.90E+03   | 5.80E-05 |
| 54-4G07   |           | 2.10E-06   | 1.20E+04   | 2.40E-02 |
| 54-4H03   |           | 3.20E-06   | 1.70E+04   | 5.30E-02 |
| ClonB UCA |           | 3.21E-08   | 4.97E+04   | 1.60E-03 |
| 58-6E11   |           | 1.80E-09   | 6.70E+04   | 1.20E-04 |
| 58-6B09   |           | 1.50E-08   | 5.40E+04   | 8.10E-04 |
| 58-6E04   |           | NA         | 8.70E+04   | No Diss  |
| 58-6F03   |           | 3.10E-11   | 8.60E+04   | 2.60E-06 |
| 54-1G05   |           | 5.90E-10   | 6.50E+04   | 3.80E-05 |
| H5 IN05   |           | ClonA UCA  | No Binding |          |
|           | 58-1C02   | 1.59E-07   | 9.30E+03   | 1.48E-03 |
|           | 54-1B01   | 2.76E-07   | 7.47E+03   | 2.06E-03 |
|           | 54-1G07   | 2.21E-07   | 7.11E+03   | 1.57E-03 |
|           | 54-4G07   | No Binding |            |          |
|           | 54-4H03   | 3.67E-06   | 3.09E+04   | 1.13E-01 |
|           | ClonB UCA | 5.79E-07   | 2.09E+04   | 1.21E-02 |
|           | 58-6E11   | 1.76E-07   | 3.50E+04   | 6.14E-03 |
|           | 58-6B09   | 7.00E-08   | 4.09E+04   | 2.86E-03 |
|           | 58-6E04   | 5.40E-09   | 1.51E+05   | 8.16E-04 |
|           | 58-6F03   | 2.00E-09   | 1.04E+05   | 2.08E-04 |
|           | 54-1G05   | 8.64E-09   | 8.37E+04   | 7.24E-04 |
|           | H2 SI57   | ClonA UCA  | No Binding |          |
| 58-1C02   |           | NA         | 2.14E+04   | No Diss  |
| 54-1B01   |           | 4.47E-07   | 6.00E+03   | 2.68E-03 |
| 54-1G07   |           | NA         | 6.42E+03   | No Diss  |
| 54-4G07   |           | 6.66E-07   | 1.95E+04   | 1.30E-02 |
| 54-4H03   |           | 8.04E-07   | 1.21E+04   | 9.71E-03 |
| ClonB UCA |           | 1.45E-07   | 5.99E+04   | 8.70E-03 |
| 58-6E11   |           | 9.52E-08   | 5.14E+04   | 4.89E-03 |
| 58-6B09   |           | 1.22E-08   | 7.25E+04   | 8.80E-04 |
| 58-6E04   |           | 2.15E-08   | 1.14E+05   | 2.45E-03 |
| 58-6F03   |           | 2.21E-09   | 1.17E+05   | 2.58E-04 |
| 54-1G05   |           | 1.77E-08   | 7.40E+04   | 1.31E-03 |
| H9 HK99   |           | ClonA UCA  | No Binding |          |
|           | 58-1C02   | No Binding |            |          |
|           | 54-1B01   | No Binding |            |          |
|           | 54-1G07   | No Binding |            |          |
|           | 54-4G07   | No Binding |            |          |
|           | 54-4H03   | No Binding |            |          |
|           | ClonB UCA | No Binding |            |          |
|           | 58-6E11   | No Binding |            |          |
|           | 58-6B09   | No Binding |            |          |
|           | 58-6E04   | 3.74E-07   | 9.50E+04   | 3.55E-02 |
|           | 58-6F03   | 5.60E-07   | 2.27E+04   | 1.27E-02 |
|           | 54-1G05   | 1.87E-07   | 1.29E+05   | 2.40E-02 |

**Table S2, related to Figure 2. X-ray data collection and refinement statistics**

| <b>Data collection</b>                                                   | 1G05 Apo                         | 1G05 with H1 HA                  | 4H03 Apo                         | 4H03 with H1 HA                  |
|--------------------------------------------------------------------------|----------------------------------|----------------------------------|----------------------------------|----------------------------------|
| Beamline                                                                 | APS 23ID-D                       | APS 23ID-D                       | APS 23ID-B                       | APS 23ID-B                       |
| Wavelength (Å)                                                           | 1.0332                           | 1.0332                           | 1.0332                           | 1.0332                           |
| Space group                                                              | P22 <sub>1</sub>                 | P321                             | P22 <sub>1</sub> 2 <sub>1</sub>  | C222 <sub>1</sub>                |
| Unit cell parameters (Å)                                                 | a=60.9, b=79.1, c=107.6          | a=b=187.4, c=132.5               | a=60.4, b=80.1, c=107.3          | a=231.5, b=259.2, c=165.1        |
| Resolution (Å)                                                           | 50-1.65 (1.71-1.65) <sup>a</sup> | 50-4.20 (4.60-4.20) <sup>a</sup> | 50-1.80 (1.87-1.80) <sup>a</sup> | 50-3.50 (3.61-3.50) <sup>a</sup> |
| Unique Reflections                                                       | 62,699 (6,106) <sup>a</sup>      | 19,952 (4,703) <sup>a</sup>      | 48,821 (5,325) <sup>a</sup>      | 62,420 (5,623) <sup>a</sup>      |
| Redundancy                                                               | 12.8 (12.3) <sup>a</sup>         | 19.2 (19.1) <sup>a</sup>         | 7.6 (7.1) <sup>a</sup>           | 6.0 (6.3) <sup>a</sup>           |
| Completeness (%)                                                         | 99.3 (98.3) <sup>a</sup>         | 99.9 (100.0) <sup>a</sup>        | 100.0 (100.0) <sup>a</sup>       | 99.8 (99.8) <sup>a</sup>         |
| <I/σ <sub>I</sub> >                                                      | 27.5 (2.1) <sup>a</sup>          | 4.8 (2.6) <sup>a</sup>           | 34.0 (2.1) <sup>a</sup>          | 9.4 (1.4) <sup>a</sup>           |
| R <sub>sym</sub> <sup>b</sup>                                            | 0.08 (0.86) <sup>a</sup>         | 0.40 (0.99) <sup>a</sup>         | 0.06 (0.71) <sup>a</sup>         | 0.19 (1.14) <sup>a</sup>         |
| R <sub>plim</sub> <sup>b</sup>                                           | 0.02 (0.25) <sup>a</sup>         | 0.09 (0.23) <sup>a</sup>         | 0.02 (0.29) <sup>a</sup>         | 0.08 (0.48) <sup>a</sup>         |
| CC <sub>1/2</sub> <sup>c</sup>                                           | 1.00 (0.96) <sup>a</sup>         | 0.99 (0.97) <sup>a</sup>         | 1.00 (0.95) <sup>a</sup>         | 0.99 (0.90) <sup>a</sup>         |
| Z <sub>a</sub> <sup>d</sup>                                              | 1                                | 1                                | 1                                | 3                                |
| <b>Refinement statistics</b>                                             |                                  |                                  |                                  |                                  |
| Resolution (Å)                                                           | 50-1.65                          | 50-4.20                          | 50-1.80                          | 50-3.50                          |
| Reflections (work)                                                       | 59,570                           | 18,836                           | 46,393                           | 59,210                           |
| Reflections (test)                                                       | 3,082                            | 923                              | 2,359                            | 3,149                            |
| R <sub>cryst</sub> (%) <sup>e</sup> / R <sub>free</sub> (%) <sup>f</sup> | 15.8 / 18.8                      | 32.3 / 38.9                      | 16.3 / 20.4                      | 17.9 / 23.2                      |
| No. of atoms                                                             |                                  |                                  |                                  |                                  |
| Protein                                                                  |                                  |                                  |                                  |                                  |
| HA                                                                       | -                                | 3,921                            | -                                | 11,759                           |
| Fab                                                                      | 3,524                            | 3,507                            | 3,577                            | 10,194                           |
| Water                                                                    | 629                              | -                                | 456                              | -                                |
| Glycan                                                                   | -                                | 14                               | -                                | 448                              |
| Solvent <sup>g</sup>                                                     | 70                               | -                                | 12                               | -                                |
| Average B-value (Å <sup>2</sup> )                                        |                                  |                                  |                                  |                                  |
| Protein                                                                  |                                  |                                  |                                  |                                  |
| HA                                                                       | -                                | 124                              | -                                | 118                              |
| Fab                                                                      | 28                               | 148                              | 38                               | 131                              |
| Water                                                                    | 43                               | -                                | 50                               | -                                |
| Glycan                                                                   | -                                | 114                              | -                                | 167                              |
| Solvent <sup>g</sup>                                                     | 79                               | -                                | 43                               | -                                |
| Wilson B-value (Å <sup>2</sup> )                                         | 20                               | 92                               | 28                               | 85                               |
| <b>RMSD from ideal geometry</b>                                          |                                  |                                  |                                  |                                  |
| Bond length (Å)                                                          | 0.006                            | 0.003                            | 0.007                            | 0.003                            |
| Bond angle (°)                                                           | 0.84                             | 0.61                             | 1.00                             | 0.55                             |
| <b>Ramachandran statistics (%)<sup>h</sup></b>                           |                                  |                                  |                                  |                                  |
| Favored                                                                  | 97.7                             | 94.2                             | 97.6                             | 96.0                             |
| Outliers                                                                 | 0.0                              | 0.0                              | 0.2                              | 0.1                              |
| <b>PDB code</b>                                                          | 6WIY                             | 6WIZ                             | 6WJO                             | 6WJ1                             |

<sup>a</sup> Numbers in parentheses refer to the highest resolution shell.

<sup>b</sup>  $R_{sym} = \sum_{hkl} \sum_i |I_{hkl,i} - \langle I_{hkl} \rangle| / \sum_{hkl} \sum_i I_{hkl,i}$  and  $R_{plim} = \sum_{hkl} (1/(n-1))^{1/2} \sum_i |I_{hkl,i} - \langle I_{hkl} \rangle| / \sum_{hkl} \sum_i I_{hkl,i}$ , where  $I_{hkl,i}$  is the scaled intensity of the  $i^{\text{th}}$  measurement of reflection  $h, k, l$ ,  $\langle I_{hkl} \rangle$  is the average intensity for that reflection, and  $n$  is the redundancy.

<sup>c</sup> CC<sub>1/2</sub> = Pearson correlation coefficient between two random half datasets.

<sup>d</sup> Z<sub>a</sub> is the number of Fab or Fab-HA protomers per crystallographic asymmetric unit.

<sup>e</sup>  $R_{cryst} = \sum_{hkl} |F_o - F_c| / \sum_{hkl} |F_o| \times 100$ , where  $F_o$  and  $F_c$  are the observed and calculated structure factors, respectively.

<sup>f</sup> R<sub>free</sub> was calculated as for R<sub>cryst</sub>, but on a test set comprising 5% of the data excluded from refinement.

<sup>g</sup> Solvent includes glycerol.

<sup>h</sup> Calculated with MolProbity (Chen et al., 2010).

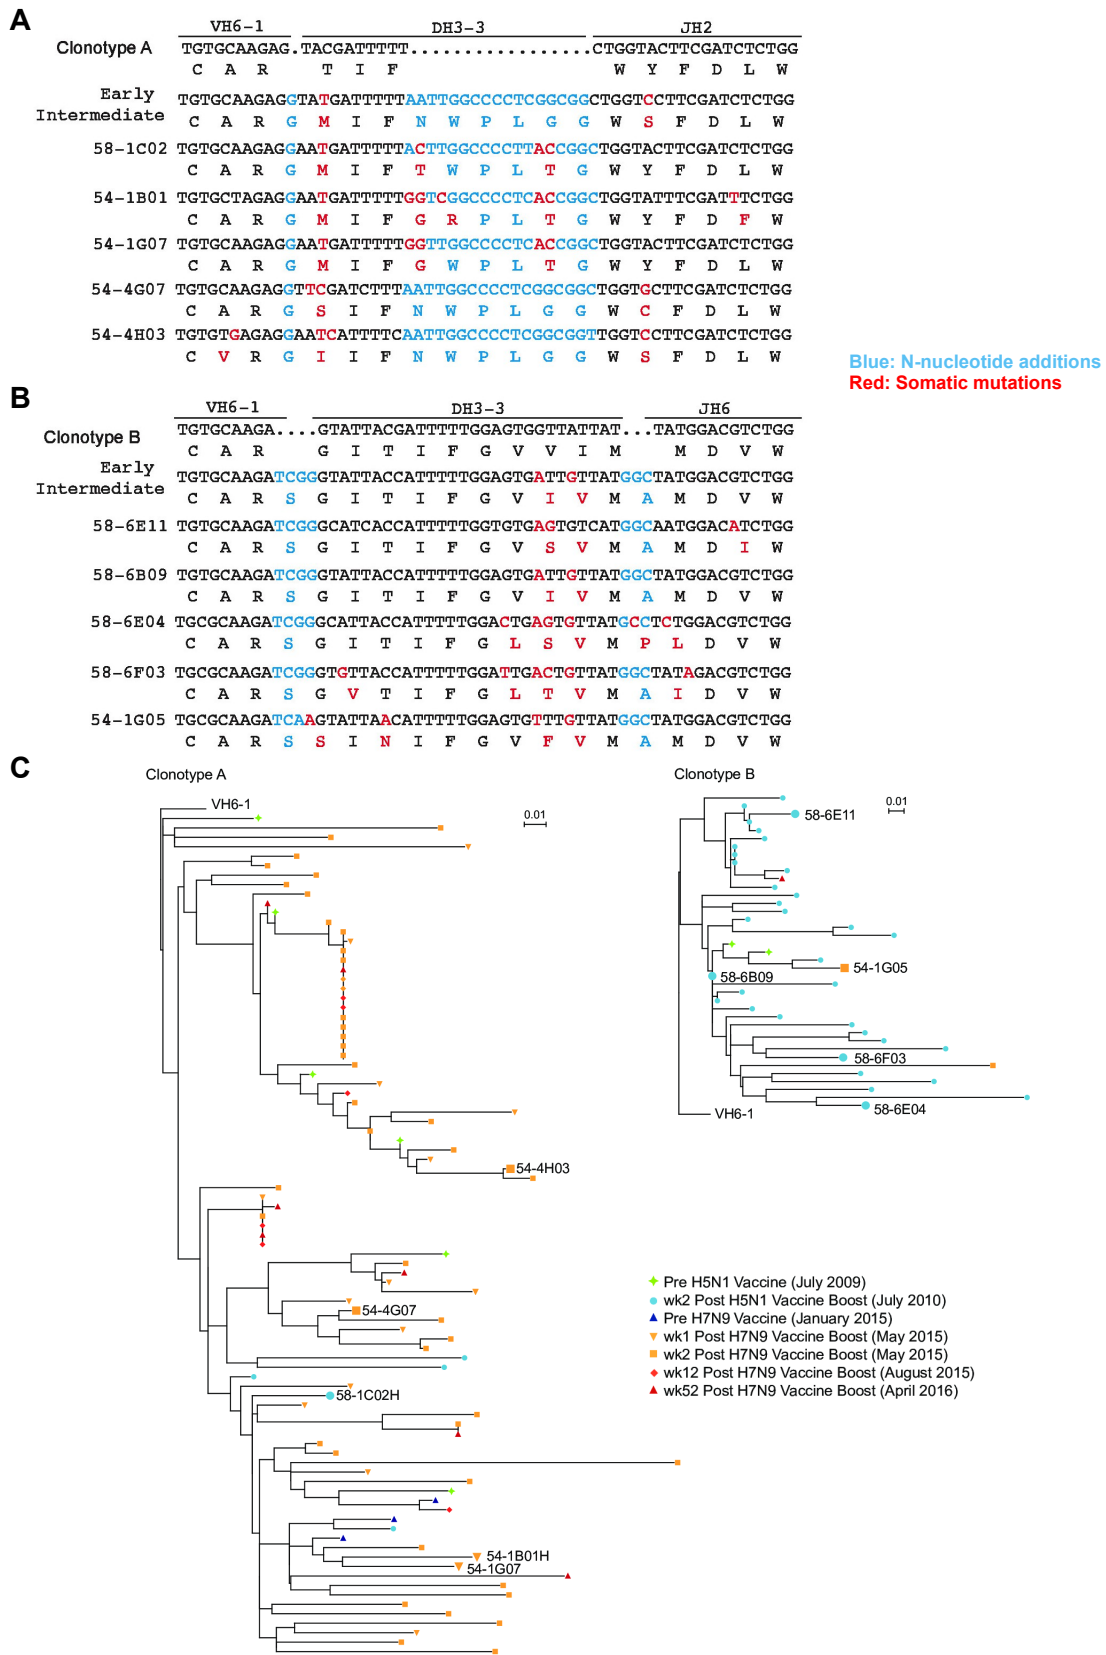

**Figure S1, related to Figure 1. Phylogenetic analysis of Clonotypes A and B. (A-B)** Sequence of the V-D-J junction of members in **(A)** clonotype A and **(B)** clonotype B, with putative gene segments indicated. N-nucleotide additions are colored blue, somatic mutations are colored red. **(C)** Phylogenetic analysis was performed on the immunoglobulin heavy chain sequence of Clonotype A and B members amplified from B cells detected at various time points before and after H5N1 and H7N9 vaccination as indicated in the legend.

|         |                                | HA1 |    |    |    |    |    |    |    |    |    |    |    |     |     | HA2 |     |    |    |    |    |    |    |    |    |    |    |    |    |    |    |    |    |    |    |    |    |    |    |    |    |    |    |    |    |    |     |     |     |     |  |  |
|---------|--------------------------------|-----|----|----|----|----|----|----|----|----|----|----|----|-----|-----|-----|-----|----|----|----|----|----|----|----|----|----|----|----|----|----|----|----|----|----|----|----|----|----|----|----|----|----|----|----|----|----|-----|-----|-----|-----|--|--|
|         |                                | 8   | 10 | 11 | 18 | 20 | 21 | 28 | 30 | 37 | 38 | 39 | 40 | 315 | 318 | 319 | 325 | 15 | 16 | 18 | 19 | 20 | 21 | 24 | 25 | 26 | 30 | 31 | 32 | 33 | 34 | 35 | 36 | 37 | 38 | 39 | 41 | 42 | 43 | 45 | 46 | 48 | 49 | 52 | 53 | 56 | 146 | 150 | 153 | 154 |  |  |
| Group 1 | A/California/04/2009 (H1N1)    | A   | A  | D  | H  | N  | N  | T  | L  | T  | H  | S  | V  | R   | T   | G   | S   | T  | G  | V  | D  | G  | W  | Y  | H  | H  | Q  | G  | S  | G  | Y  | A  | A  | D  | L  | K  | T  | Q  | N  | I  | D  | I  | T  | V  | N  | I  | N   | E   | K   | N   |  |  |
|         | A/New Caledonia/20/1999 (H1N1) | T   | A  | D  | H  | N  | N  | T  | L  | T  | H  | S  | V  | R   | T   | G   | S   | T  | G  | V  | D  | G  | W  | Y  | H  | H  | Q  | G  | S  | G  | Y  | A  | A  | D  | Q  | K  | T  | Q  | N  | I  | N  | I  | T  | V  | N  | I  | N   | E   | K   | N   |  |  |
|         | A/Canada/720/2005 (H2N2)       | -   | G  | D  | H  | N  | N  | T  | L  | T  | H  | A  | K  | V   | T   | G   | Q   | Q  | G  | V  | D  | G  | W  | Y  | H  | H  | Q  | G  | S  | G  | Y  | A  | A  | D  | K  | E  | T  | Q  | K  | F  | D  | I  | T  | V  | N  | I  | D   | N   | K   | N   |  |  |
|         | A/Indonesia/5/2005 (H5N1)      | -   | S  | D  | H  | N  | N  | T  | M  | T  | H  | A  | Q  | V   | T   | G   | Q   | Q  | G  | V  | D  | G  | W  | Y  | H  | H  | Q  | G  | S  | G  | Y  | A  | A  | D  | K  | E  | T  | Q  | K  | I  | D  | V  | T  | V  | N  | I  | N   | E   | R   | N   |  |  |
|         | A/Hong Kong/1073/1999 (H9N2)   | S   | A  | D  | Q  | T  | N  | T  | T  | T  | H  | A  | K  | K   | V   | G   | A   | P  | G  | V  | A  | G  | W  | F  | Q  | H  | Q  | G  | V  | G  | M  | A  | A  | D  | R  | D  | T  | Q  | K  | I  | D  | I  | T  | V  | N  | V  | D   | E   | R   | N   |  |  |
| Group 2 | A/Perth/16/2009 (H3N2)         | N   | T  | A  | H  | V  | P  | T  | T  | T  | N  | A  | T  | K   | T   | G   | E   | E  | G  | V  | D  | G  | W  | F  | R  | H  | E  | G  | R  | G  | Q  | A  | A  | D  | L  | K  | T  | Q  | A  | I  | D  | I  | N  | L  | N  | I  | N   | G   | R   | N   |  |  |
|         | A/Texas/50/2012 (H3N2)         | N   | T  | A  | H  | V  | P  | T  | T  | T  | N  | A  | T  | K   | T   | G   | E   | E  | G  | V  | D  | G  | W  | F  | R  | H  | E  | G  | R  | G  | Q  | A  | A  | D  | L  | K  | T  | Q  | A  | I  | D  | I  | N  | L  | N  | I  | N   | G   | R   | N   |  |  |
|         | A/Shanghai/02/2013 (H7N9)      | T   | A  | D  | H  | V  | S  | T  | T  | V  | N  | A  | T  | L   | T   | G   | E   | E  | G  | I  | D  | G  | W  | F  | R  | H  | Q  | G  | E  | G  | T  | A  | A  | D  | Y  | K  | T  | Q  | S  | I  | D  | I  | T  | L  | N  | I  | D   | A   | R   | N   |  |  |
| Epitope | 54-4H03                        |     |    |    |    |    |    |    |    |    |    |    |    |     |     |     |     |    |    |    |    |    |    |    |    |    |    |    |    |    |    |    |    |    |    |    |    |    |    |    |    |    |    |    |    |    |     |     |     |     |  |  |
|         | 54-1G05                        |     |    |    |    |    |    |    |    |    |    |    |    |     |     |     |     |    |    |    |    |    |    |    |    |    |    |    |    |    |    |    |    |    |    |    |    |    |    |    |    |    |    |    |    |    |     |     |     |     |  |  |
|         | 56.a.09                        |     |    |    |    |    |    |    |    |    |    |    |    |     |     |     |     |    |    |    |    |    |    |    |    |    |    |    |    |    |    |    |    |    |    |    |    |    |    |    |    |    |    |    |    |    |     |     |     |     |  |  |
|         | MEDI8852                       |     |    |    |    |    |    |    |    |    |    |    |    |     |     |     |     |    |    |    |    |    |    |    |    |    |    |    |    |    |    |    |    |    |    |    |    |    |    |    |    |    |    |    |    |    |     |     |     |     |  |  |

**Figure S2, related to Figure 2. Epitopes of V<sub>H</sub>6-1-encoded HA stem-directed antibodies.** Amino-acid variants in different strains are shown for the epitope residues of 54-4H03, 54-1G05, 56.a.09 (Joyce et al., 2016), and MEDI8852 (Kallewaard et al., 2016). The epitope residues for each antibody are indicated by the black squares at the bottom. HA1 residue 38 is glycosylated in group 2 HAs.

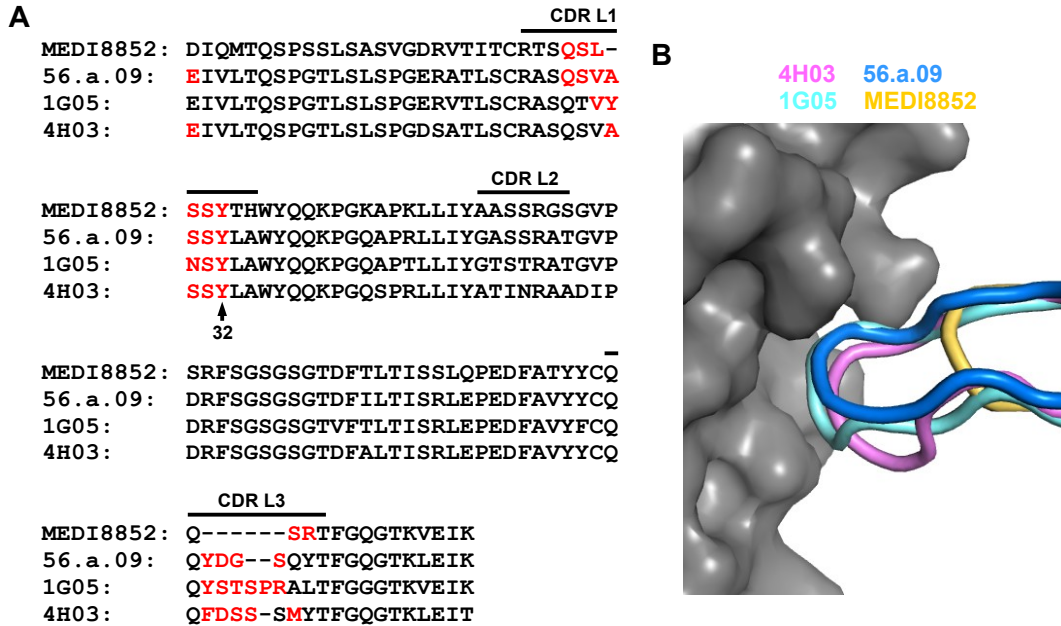

**Figure S3, related to Figure 3. Comparison of the conformations of CDR L3 among different V<sub>H</sub>6-1-encoded bnAbs. (A)** Alignment of the light chain sequences from 54-4H03, 54-1G05, 56.a.09 (Joyce et al., 2016), and MEDI8852 (Kallewaard et al., 2016). The regions of the sequence that correspond to CDR L1, L2, and L3 (Kabat numbering scheme) are indicated. Paratope residues are highlighted in red. **(B)** The lengths of the CDR L3 in 54-4H03, 54-1G05, and 56.a.09 are similar, but are much longer than that of MEDI8852.

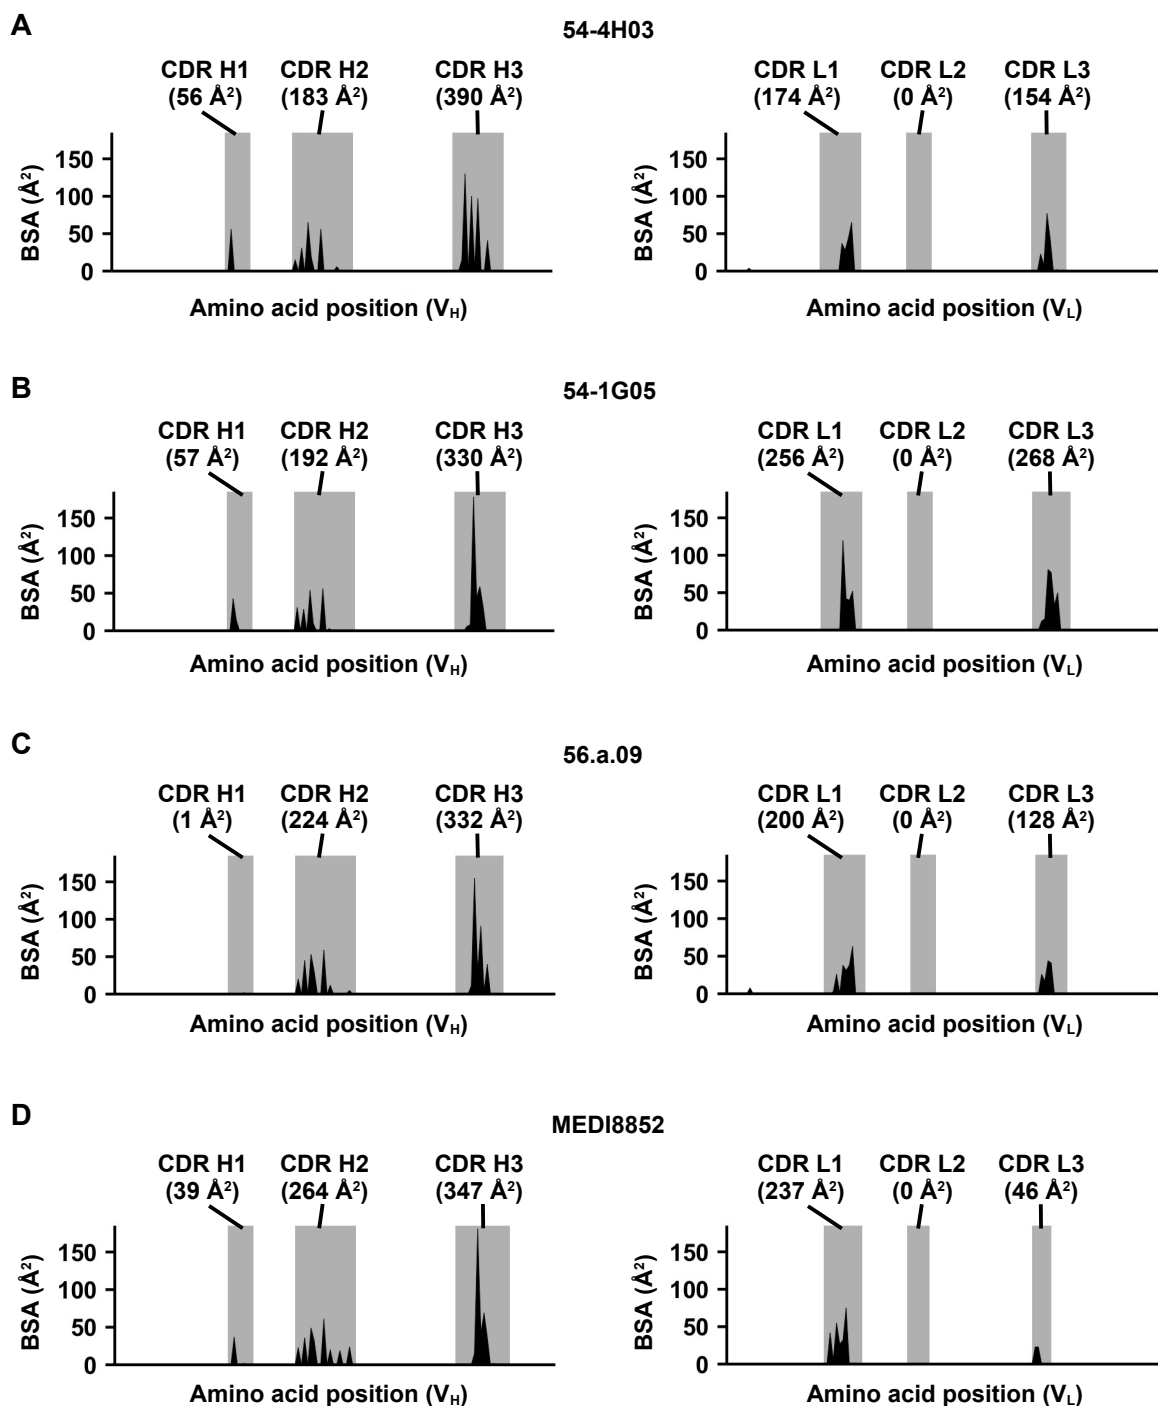

**Figure S4, related to Figure 3. Buried surface area (BSA) of paratopes of V<sub>H</sub>6-1-encoded bnAbs upon binding to HA.** Buried surface area (BSA) upon binding for each residue in (A) 54-4H03 Fab, (B) 54-1G05 Fab, (C) 56.a.09 Fab, and (D) MEDI8852 Fab, is plotted along the residue position in the sequence. The regions corresponding to the CDRs (based on Kabat numbering) are shaded in grey. The BSA of each CDR is indicated in parentheses.

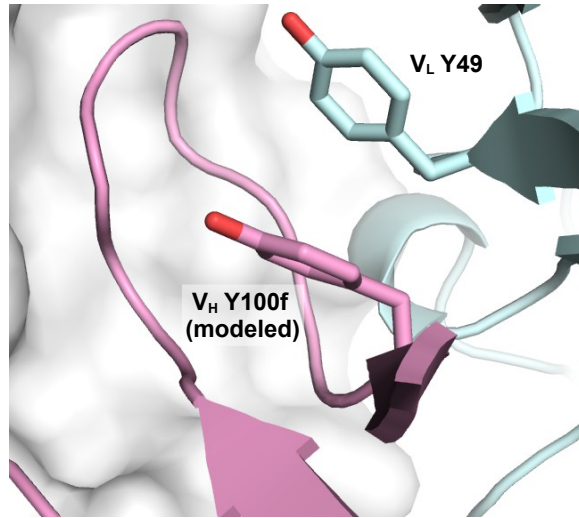

**Figure S5, related to Figure 6. Potential  $\pi$ - $\pi$  stacking interaction between V<sub>H</sub> Y100f and V<sub>L</sub> Y49 in clonotype A. Somatic mutation V<sub>H</sub> S100fY is modeled on 54-1G05, and can form a  $\pi$ - $\pi$  stacking interaction with Tyr49 of the light chain .**



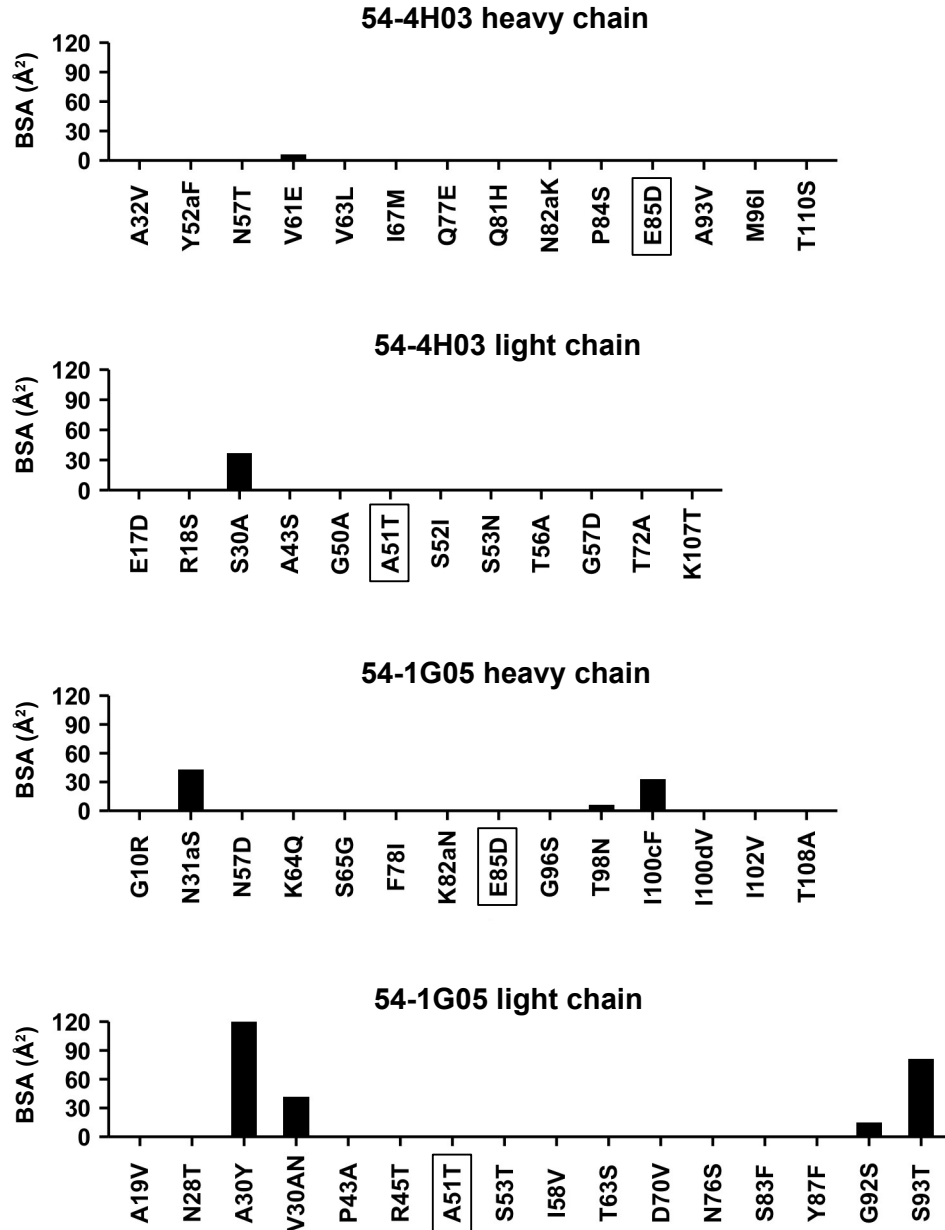

**Figure S6, related to Figure 6 and Figure 7. Buried surface area of somatic mutations.** The buried surface area (BSA) of each somatic mutation in 54-4H03 and 54-1G05 is shown. BSA is calculated as (solvent accessible surface area of the apo form) – (solvent accessible surface area of the bound form). Somatic mutations that are common between 54-4H03 and 54-1G05 are boxed.

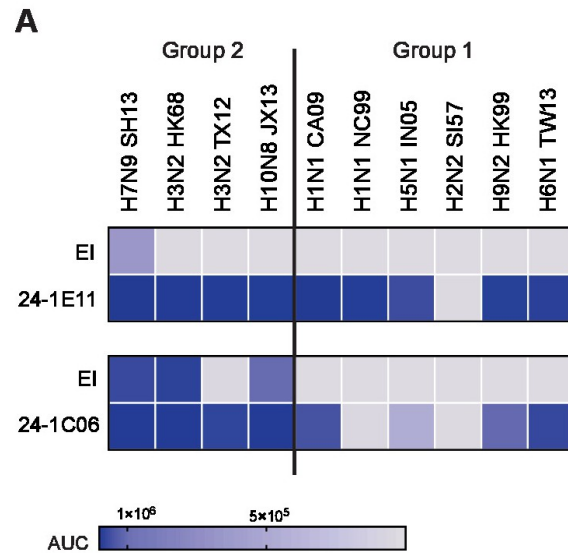

**B**  
 CDR H3 for 24-1E11: CARSGLLYFGMLLHFDYW  
 CDR H3 for 24-1C06: CARAQLTIFGVVINLDSW

**Figure S7, related to Figure 1. Additional analysis of V<sub>H</sub>6-1-encoded bnAbs.**  
**(A)** V<sub>H</sub>6-1/V<sub>K</sub>3-20-encoded antibodies 24-1E11 and 24-1C06 were both isolated from another donor. The binding of these two antibodies as well as their corresponding early intermediate (EI) to recombinant HA from different subtypes were measured by MSD. The area under the binding curve (AUC) of each mAb for each HA is indicated by color as shown in the legend. **(B)** The amino-acid sequences for CDR H3 of 24-1E11 and 24-1C06.
